# Supplementary material for: Ag supported on alumina for the epoxidation of 1-hexene with molecular oxygen: the effect of Ag+/Ag0
Source: Royal Society of Chemistry journal article supplement (doi:10.1039/d1nj05926b), 2022-01-01
Supplement: d1nj05926b1.pdf [file d1nj05926b1.pdf]

## Electronic Supplementary Information

# Ag supported on alumina for the epoxidation of 1-hexene with molecular oxygen: the effect of Ag<sup>+</sup>/Ag<sup>0</sup>

Jingzhao Ren,<sup>ac</sup> Liancheng Wang,<sup>\*a</sup> Penghui Li,<sup>ac</sup> Xiangying Xing,<sup>ac</sup> Huixiang Wang,<sup>a</sup> and Baoliang Lv<sup>\*ab</sup>

<sup>a</sup> State Key Laboratory of Coal Conversion, Institute of Coal Chemistry, Chinese Academy of Sciences, Taiyuan 030001, China.

E-mail: [wanglc@sxicc.ac.cn](mailto:wanglc@sxicc.ac.cn), [lbl604@sxicc.ac.cn](mailto:lbl604@sxicc.ac.cn)

<sup>b</sup> State Key Laboratory of High-Efficiency Utilization of Coal and Green Chemical Engineering, Ningxia University, Yinchuan 750021, China.

<sup>c</sup> University of Chinese Academy of Sciences, Beijing 100049, China

## Experimental

The calculation equations on the yield of the products ( $X_i$ ) and 1-hexene conversion were followed the Huang et al.<sup>1</sup>, as follows:

$$X_i = \frac{N_i * n_{\text{compounds}} / 6}{n_{1\text{-Hexene}}} \times 100\% \quad (1)$$

$$\text{Conversion} = \frac{\sum n * C_n \text{ Compounds} / 6}{n_{1\text{-Hexene}}} \times 100\% \quad (2)$$

Where  $N_i$  represents the number of carbon atoms for different compounds,  $n_{\text{compounds}}$  represents the molar mass for different compounds,  $n_{1\text{-hexene}}$  represents initial of 1-hexene.

## Results and discussion

Table S1 Ag content of the Ag/PBAs catalysts

| Sample      | Ag content (wt. %)* |
|-------------|---------------------|
| Ag/PBAs 250 | 1.00                |
| Ag/PBAs 300 | 0.96                |
| Ag/PBAs 350 | 1.32                |
| Ag/PBAs 400 | 0.90                |
| Ag/PBAs 450 | 1.12                |

\* Determined by ICP-AES measurement

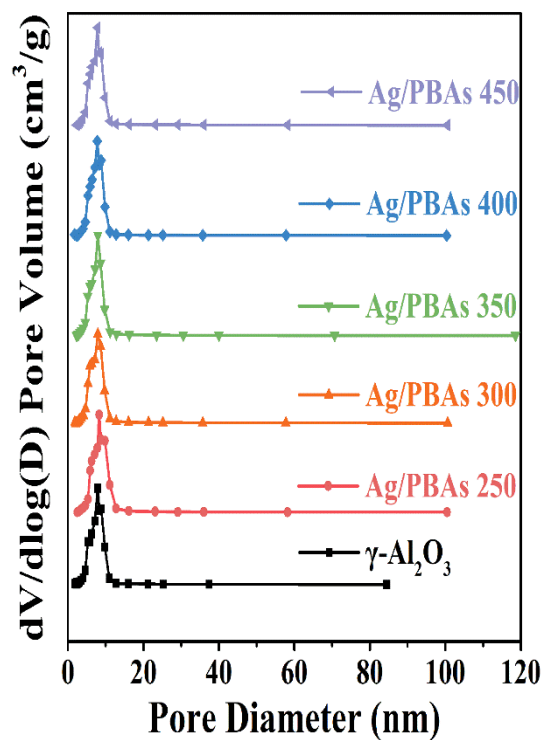

Fig. S1 Pore size distribution plots of pure PBAs and Ag/PBAs catalysts

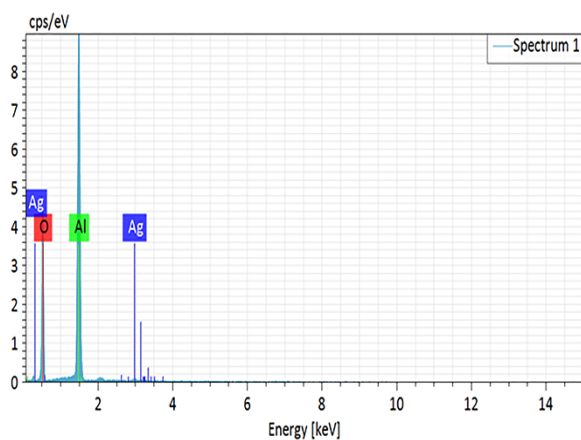

Fig. S2 Spectrum of elementary of Ag/PBAs 350.

Table S2 Elementary analysis results of Ag/PBAs 350.

| Element | Weight (%) | Atomic (%) |
|---------|------------|------------|
| O       | 34.1       | 62.4       |
| Al      | 34.2       | 37.2       |
| Ag      | 1.4        | 0.4        |

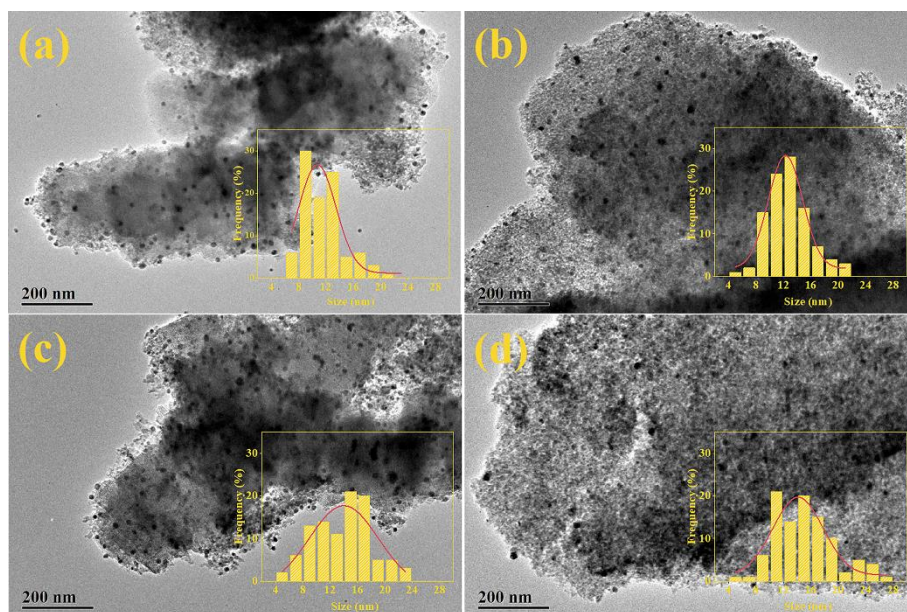

Fig. S3 TEM images of (a) Ag/PBAs 250, (b) Ag/PBAs 300, (c) Ag/PBAs 400, (d) Ag/PBAs 450

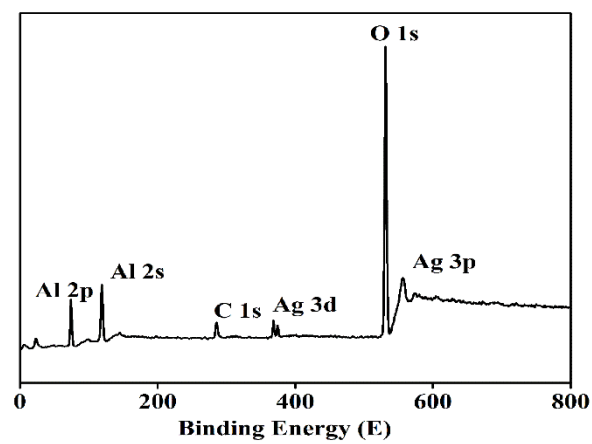

Fig. S4 XPS survey of Ag/PBAs 350

Table S3 Experimental results of different TBHP additions

| TBHP amount (mmol)   | 0      | 0.2  | 0.4   | 0.8   |
|----------------------|--------|------|-------|-------|
| Conversion (%)       | 0.43   | 8.18 | 13.84 | 14.03 |
| Product yield (%)    |        |      |       |       |
| 1,2-Epoxyhexane      | 0.03   | 3.29 | 6.08  | 4.71  |
| 1-Hexen-3-one        | 0.04   | 0.30 | 0.79  | 0.64  |
| 1-Hexen-3-ol         | 0.03   | 0.80 | 0.90  | 0.42  |
| 2-Hexenal            | 0.03   | 0.22 | 0.34  | 0.46  |
| 2-Hexenoic acid      | 0.12   | 0.22 | 0.33  | 0.87  |
| 1,2-Hexanediol       | 0.01   | 0.31 | 0.62  | 0.49  |
| 1-Hydroxyhexan-2-one | 0.03   | 0.43 | 0.50  | 2.15  |
| Valeraldehyde        | 0.01   | 0.23 | 0.32  | 0.45  |
| Valeric acid         | 0.10   | 0.54 | 0.82  | 0.88  |
| CO                   | 0.01   | 0.11 | 0.09  | 0.13  |
| CH <sub>4</sub>      | < 0.01 | 0.01 | 0.01  | 0.11  |
| CO <sub>2</sub>      | < 0.01 | 0.24 | 0.34  | 0.28  |
| Others <sup>b</sup>  | 0.02   | 1.49 | 2.71  | 2.43  |

<sup>a</sup> Reaction conditions: 1-hexene (4 mmol), 80 mg catalysts, 6 h, 140 °C, 0.3 MPa O<sub>2</sub>

<sup>b</sup> Others include at least 15 unidentified products with yields less than 0.3%

Table S4 Experimental results of different reaction temperatures

| Reaction temperature (°C) <sup>a</sup> | 80     | 100    | 120    | 140   |
|----------------------------------------|--------|--------|--------|-------|
| Conversion (%)                         | 2.72   | 4.14   | 11.68  | 13.84 |
| Product yield (%)                      |        |        |        |       |
| 1,2-Epoxyhexane                        | 0.22   | 0.95   | 4.29   | 6.08  |
| 1-Hexen-3-one                          | 0.43   | 0.52   | 1.16   | 0.79  |
| 1-Hexen-3-ol                           | 0.99   | 1.05   | 1.49   | 0.90  |
| 2-Hexenal                              | 0.30   | 0.22   | 0.46   | 0.34  |
| 2-Hexenoic acid                        | 0.17   | 0.24   | 0.94   | 0.33  |
| 1,2-Hexanediol                         | 0.02   | 0.12   | 0.57   | 0.62  |
| 1-Hydroxyhexan-2-one                   | 0.01   | 0.06   | 0.37   | 0.50  |
| Valeraldehyde                          | 0.12   | 0.14   | 0.35   | 0.32  |
| Valeric acid                           | 0.05   | 0.12   | 0.49   | 0.82  |
| CO                                     | < 0.01 | 0.01   | 0.02   | 0.09  |
| CH <sub>4</sub>                        | < 0.01 | < 0.01 | < 0.01 | 0.01  |
| CO <sub>2</sub>                        | 0.01   | 0.09   | 0.07   | 0.34  |
| Others                                 | 0.39   | 0.65   | 1.48   | 2.71  |

<sup>a</sup> Reaction conditions: 1-hexene (4 mmol), TBHP (0.4 mmol), 80 mg catalysts, 6 h, 0.3 MPa O<sub>2</sub>

Table S5 Experimental results of different oxygen partial pressures

| Oxygen partial pressures (MPa) <sup>a</sup> | 0.1    | 0.3   | 0.5   |
|---------------------------------------------|--------|-------|-------|
| Conversion (%)                              | 5.23   | 13.84 | 12.62 |
| Product yield (%)                           |        |       |       |
| 1,2-Epoxyhexane                             | 1.70   | 6.08  | 4.18  |
| 1-Hexen-3-one                               | 0.19   | 0.79  | 0.35  |
| 1-Hexen-3-ol                                | 1.14   | 0.90  | 0.44  |
| 2-Hexenal                                   | 0.23   | 0.34  | 0.76  |
| 2-Hexenoic acid                             | 0.18   | 0.33  | 0.35  |
| 1,2-Hexanediol                              | 0.21   | 0.62  | 0.50  |
| 1-Hydroxyhexan-2-one                        | 0.25   | 0.50  | 0.96  |
| Valeraldehyde                               | 0.30   | 0.32  | 0.17  |
| Valeric acid                                | 0.25   | 0.82  | 0.66  |
| CO                                          | < 0.01 | 0.09  | 0.29  |
| CH <sub>4</sub>                             | < 0.01 | 0.01  | 0.04  |
| CO <sub>2</sub>                             | 0.01   | 0.34  | 0.80  |
| Others                                      | 0.75   | 2.71  | 3.13  |

<sup>a</sup> Reaction conditions: 1-hexene (4 mmol), TBHP (0.4 mmol), 80 mg catalysts, 6 h, 140 °C

Table S6 Experimental results of Ag/PBAs catalysts calcined at different temperatures.

| Catalyst <sup>a</sup> | Ag/PBAs | Ag/PBAs | Ag/PBAs | Ag/PBAs | Ag/PBAs |
|-----------------------|---------|---------|---------|---------|---------|
|                       | 250     | 300     | 350     | 400     | 450     |
| Conversion (%)        | 7.22    | 7.80    | 13.84   | 10.38   | 10.69   |
| Product yield (%)     |         |         |         |         |         |
| 1,2-Epoxyhexane       | 2.15    | 3.15    | 6.08    | 4.05    | 3.44    |
| 1-Hexen-3-one         | 0.21    | 0.27    | 0.79    | 0.33    | 0.34    |
| 1-Hexen-3-ol          | 0.94    | 0.61    | 0.90    | 0.83    | 0.73    |
| 2-Hexenal             | 0.16    | 0.19    | 0.34    | 0.21    | 0.19    |
| 2-Hexenoic acid       | 0.36    | 0.20    | 0.33    | 0.29    | 0.34    |
| 1,2-Hexanediol        | 0.42    | 0.45    | 0.62    | 0.55    | 0.65    |
| 1-Hydroxyhexan-2-one  | 0.41    | 0.53    | 0.50    | 0.46    | 0.77    |
| Valeraldehyde         | 0.28    | 0.24    | 0.32    | 0.36    | 0.35    |
| Valeric acid          | 0.45    | 0.71    | 0.82    | 0.89    | 0.84    |
| CO                    | 0.10    | 0.10    | 0.09    | 0.13    | 0.14    |
| CH <sub>4</sub>       | 0.02    | 0.02    | 0.01    | 0.04    | 0.02    |
| CO <sub>2</sub>       | 0.24    | 0.17    | 0.34    | 0.35    | 0.19    |
| Others                | 1.46    | 1.72    | 2.71    | 1.90    | 2.68    |

<sup>a</sup> Reaction conditions: 1-hexene (4 mmol), TBHP (0.4 mmol), 80 mg catalysts, 6 h, 140 °C, 0.3 MPa O<sub>2</sub>

## Reference

1 W. Xiong, X. Gu, Z. Zhang, P. Chai, Y. Zang, Z. Yu, D. Li, H. Zhang, Z. Liu and W. Huang, Nat. Commun., 2021, 12, 5921.
